# Supplementary material for: Understanding the Action of RARγ Agonists on Human Osteochondroma Explants
Source: MDPI journal article supplement (doi:10.3390/ijms21082686), 2020-04-13
Supplement: s1 [file s1]

A. hOC5

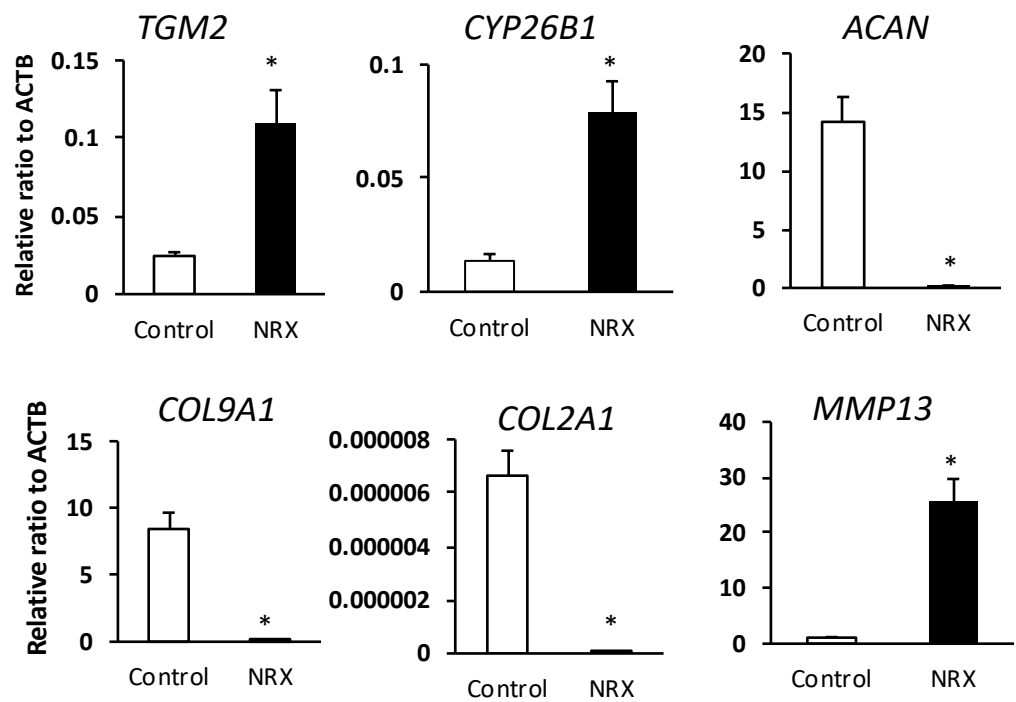

B. hOC6

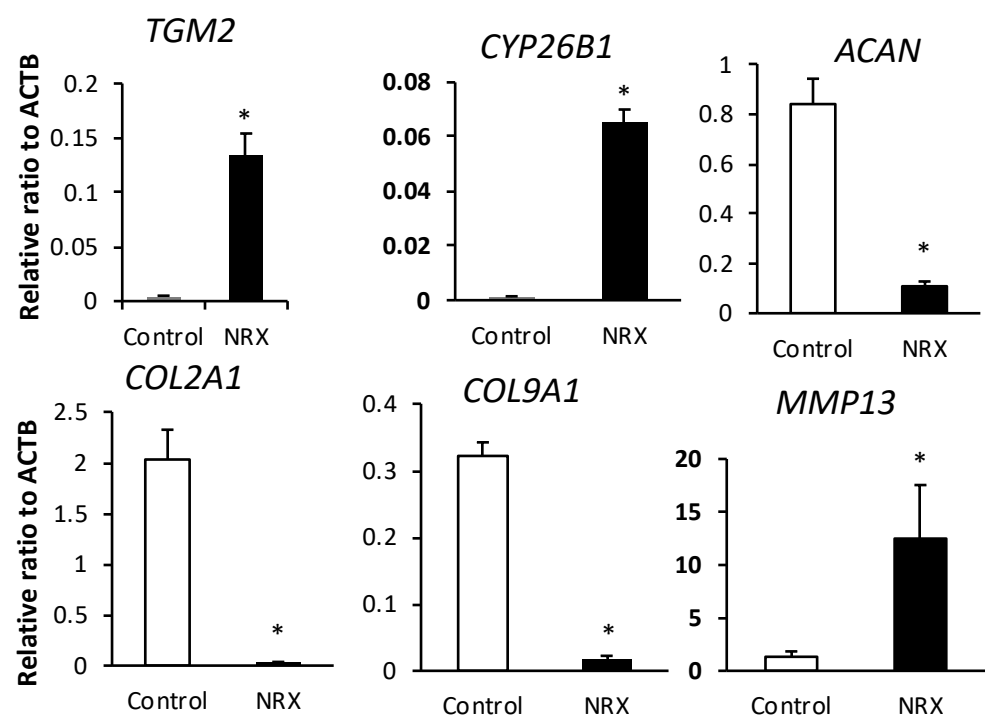

Supplement Figure 1. Gene expression analysis of RAR $\gamma$  agonist treatment and control groups of osteochondroma explant cultures (OC5 and OC6). The osteochondroma explants (OC5 and 6) were treated with vehicle (0.1% ethanol) and 300 nM NRX204647 in DMEM containing 2% charcoal-treated FBS (n=3). Total RNAs were prepared and subjected to qPCR to examine gene expression levels of *CYP26B1*, *TGM2*, *ACAN*, *COL2A1*, *COL9A1* and *MMP13*. The values are average and standard deviation (SD). \*  $p < 0.05$  versus control.

Supplement table 5. Top 5 canonical pathways ranked by IPA

hOC5

| Pathways                                                    | -log(p-value) | Ratio | Molecules                                                                                                                                                                                                                                                                                                                                                                                                                                                       |
|-------------------------------------------------------------|---------------|-------|-----------------------------------------------------------------------------------------------------------------------------------------------------------------------------------------------------------------------------------------------------------------------------------------------------------------------------------------------------------------------------------------------------------------------------------------------------------------|
| Osteoarthritis Pathway                                      | 20.0          | 0.322 | ACAN,ACVRL1,ADAMTS5,ALPL,ANKH,ANXA2,BGLAP,BMP2,CASP4,CNMD,COL10A1,COL2A1,CREB3,CREBBP,CTNNB1,DDIT4,DDR2,DLX5,FGF2,FGFR1,FGFR3,FOXO3,FRZB,FZD5,FZD7,FZD9,GLI2,GLI3,GLIS2,GRE M1,H19,HDAC4,HES1,IHH,IL1R1,IL1RAP,ITGA2,ITGA4,JAG1,LEF1,MA TN3,MEF2C,MMP13,MMP3,MMP9,NAMPT,PDGFC,PGF,PPARG,PRKA B2,PTCH1,PTH1R,RBP4,RUNX2,SIRT1,SLC39A8,SMAD1,SMAD6,SMAD 9,SOX9,SPHK1,SPP1,TCF4,TCF7,TIMP3,TNFRSF1A,TNFRSF1B,VEGFA                                                 |
| EIF2 Signaling                                              | 14.2          | 0.272 | ACTA2,ACTB,AGO1,ATF3,ATF5,CDK11A,DDIT3,EIF1,EIF2B5,EIF2S1,EIF 2S2,HRAS,HSPA5,MRAS,MYC,PIK3CA,PIK3CG,PIK3R5,PPP1R15A,RALA ,RASD1,RPL10,RPL10A,RPL12,RPL15,RPL17,RPL18A,RPL21,RPL22L1,R PL26,RPL29,RPL30,RPL31,RPL32,RPL34,RPL35,RPL35A,RPL36,RPL37A ,RPL39,RPL41,RPL5,RPL7,RPL8,RPS12,RPS13,RPS15A,RPS17,RPS18,R PS23,RPS27A,RPS29,RPS3,RPS5,RPS6,RPS8,RPSA,SHC1,TRIB3,VEGFA, WARS1                                                                              |
| Hepatic Fibrosis Signaling Pathway                          | 9.46          | 0.198 | ACTA2,CCN2,CDC42,COL10A1,COL11A2,COL18A1,COL1A1,COL2A1,C REB3,CREBBP,CTNNB1,DVL2,EDNRA,EZH2,FGF2,FGFR1,FOXO1,FZD5, FZD7,FZD9,GLI2,GLI3,GLIS2,HRAS,ICAM1,IKBKE,IL1R1,IL1RAP,ITGA2,I TGA4,ITGB3,JAK2,LEF1,MAP2K5,MAP2K6,MMP13,MRAS,MYC,MYD8 8,MYLK,PDCC4,PDGFA,PDGFC,PDGFD,PDGFRB,PGF,PIK3CA,PIK3CG,P IK3R5,PPARG,PRKCZ,PTCH1,RALA,RASD1,RHOBTB2,RHOU,RND3,SOD 2,SPP1,STAT3,TCF4,TCF7,TGFB2,TGFB3,TIMP1,TNFRSF11B,TNFRSF1A ,TNFRSF1B,VCAM1,VEGFA,WNT11,WNT3,WNT5A |
| Human Embryonic Stem Cell Pluripotency                      | 8.96          | 0.274 | BDNF,BMP2,BMP5,BMP6,CTNNB1,FGF2,FGFR1,FGFR2,FGFR3,FGFR4, FGFRL1,FOXO1,FZD5,FZD7,FZD9,LEF1,MRAS,NOG,PDGFA,PDGFC,PD GFD,PDGFRB,PIK3CA,PIK3CG,PIK3R5,S1PR1,SALL4,SMAD1,SMAD6,SP HK1,TCF4,TCF7,TGFB2,TGFB3,WNT11,WNT3,WNT5A                                                                                                                                                                                                                                         |
| Regulation of the Epithelial-Mesenchymal Transition Pathway | 8.35          | 0.234 | CDH2,CTNNB1,DVL2,EGR1,ETS1,FGF2,FGFR1,FGFR2,FGFR3,FGFR4,F GFRL1,FOXC2,FZD5,FZD7,FZD9,HRAS,ID2,JAG1,JAK2,JAK3,LEF1,MAP 2K5,MAP2K6,MMP9,MRAS,NOTCH2,NOTCH3,PDGFD,PDGFRB,PIK3C A,PIK3CG,PIK3R5,RALA,RASD1,SMURF1,SNAI2,STAT3,TCF4,TCF7,TGF B2,TGFB3,WNT11,WNT3,WNT5A,ZEB2                                                                                                                                                                                          |

| Pathways                                                  | -log(p-value) | Ratio | Molecules                                                                                                                                                                                                                                                                                                                                                                 |
|-----------------------------------------------------------|---------------|-------|---------------------------------------------------------------------------------------------------------------------------------------------------------------------------------------------------------------------------------------------------------------------------------------------------------------------------------------------------------------------------|
| Hepatic Fibrosis /<br>Hepatic Stellate Cell<br>Activation | 10.2          | 0.237 | A2M,ACTA2,AGTR1,CCL2,CD40,COL10A1,COL11A1,COL11A2,COL12A1,COL15A1,COL16A1,COL1A1,COL1A2,COL2A1,COL4A1,COL5A1,COL6A3,COL7A1,COL8A2,COL9A1,COL9A2,COL9A3,CSF1,FGF2,FN1,ICAM1,IFNAR2,IFNGR2,IGF1,IGF1R,IGF2,IL10,IL4R,LBP,MMP13,MYH10,NFKB2,PGF,SMAD4,TIMP1,TLR4,TNFRSF11B,TNFRSF1B,VCAM1                                                                                    |
| Interferon Signaling                                      | 9.33          | 0.472 | IFI6,IFIT1,IFIT3,IFITM1,IFITM3,IFNAR2,IFNGR2,IRF1,ISG15,JAK1,JAK2,MX1,OAS1,PSMB8,PTPN2,STAT2,TAP1                                                                                                                                                                                                                                                                         |
| Osteoarthritis<br>Pathway                                 | 8.88          | 0.213 | ACAN,ADAMTS5,ANKH,BMP2,BMPR1A,CASP4,CEBPB,CNMD,COL10A1,COL2A1,CTNNA1,DDIT4,FGF2,FGFR3,FN1,FRZB,FZD1,FZD4,FZD5,FZD6,FZD7,GLI3,GREM1,H19,HDAC4,HES1,ITGA4,ITGA5,JAG1,MATN3,MEF2C,MMP13,MYBBP1A,NFKB2,PGF,PRKAA2,PTGS2,RARRES2,SMAD4,SMAD9,SOX9,TCF7L1,TLR4,TNFRSF1B,ZNF875                                                                                                  |
| Hepatic Fibrosis<br>Signaling Pathway                     | 5.85          | 0.155 | ACTA2,ACVR2B,AGTR1,CACNA1C,CALM1 (includes others),CCL2,CD40,CEBPB,COL10A1,COL11A2,COL1A1,COL1A2,COL2A1,DIRAS3,ELK1,FGF2,FOS,FZD1,FZD4,FZD5,FZD6,FZD7,GLI3,ICAM1,IKBKB,IL17RA,ITGA4,ITGA5,ITGB3,JAK1,JAK2,MAP2K1,MAP2K3,MMP13,MRAS,NFKB2,NFKBID,NOX4,OPN1SW,PGF,PRKD1,RASD1,RHOB,RHOBTB1,SDHB,SMAD4,SOS2,TCF7L1,TF,TIMP1,TIRAP,TLR4,TNFRSF11B,TNFRSF1B,VCAM1,WNT5A,ZNF875 |
| GP6 Signaling<br>Pathway                                  | 5.63          | 0.218 | CALM1,COL10A1,COL11A1,COL11A2,COL12A1,COL15A1,COL16A1,COL1A1,COL1A2,COL2A1,COL4A1,COL5A1,COL6A3,COL7A1,COL8A2,COL9A1,COL9A2,COL9A3,GRAP2,ITGB3,ITPR1,LAMA3,LAMB3,LAMC2,LYN,PRKD1                                                                                                                                                                                          |

| Pathways                       | -log(p-value) | Ratio | Molecules                                                                                                                                                                        |
|--------------------------------|---------------|-------|----------------------------------------------------------------------------------------------------------------------------------------------------------------------------------|
| T Helper Cell Differentiation  | 6.99          | 0.219 | <i>CD40,CD86,GATA3,HLA-DMA,HLA-DMB,HLA-DQA1,HLA-DQB1,HLA-DRA,HLA-DRB1,HLA-DRB5,IFNGR1,IL10RA,IL21R,STAT1,STAT6,TNFRSF11B</i>                                                     |
| Th1 Pathway                    | 6.41          | 0.165 | <i>CD4,CD40,CD86,DLL1,GATA3,HAVCR2,HLA-DMA,HLA-DMB,HLA-DPA1,HLA-DPB1,HLA-DQA1,HLA-DQB1,HLA-DRA,HLA-DRB1,HLA-DRB5,IFNAR1,IFNGR1,IL10RA,NFATC1,STAT1</i>                           |
| Th1 and Th2 Activation Pathway | 6.20          | 0.140 | <i>BHLHE41,CD4,CD40,CD86,DLL1,GATA3,HAVCR2,HLA-DMA,HLA-DMB,HLA-DPA1,HLA-DPB1,HLA-DQA1,HLA-DQB1,HLA-DRA,HLA-DRB1,HLA-DRB5,IFNAR1,IFNGR1,IKZF1,IL10RA,NFATC1,STAT1,STAT6,TGFB3</i> |
| Antigen Presentation Pathway   | 6.16          | 0.282 | <i>CD74,CIITA,HLA-DMA,HLA-DMB,HLA-DPA1,HLA-DPB1,HLA-DQA1,HLA-DQB1,HLA-DRA,HLA-DRB1,HLA-DRB5</i>                                                                                  |
| B Cell Development             | 5.59          | 0.278 | <i>CD40,CD86,HLA-DMA,HLA-DMB,HLA-DQA1,HLA-DQB1,HLA-DRA,HLA-DRB1,HLA-DRB5,IL7R</i>                                                                                                |

| Pathways                                                  | -log(p-value) | Ratio | Molecules                                                                                                                                                                                        |
|-----------------------------------------------------------|---------------|-------|--------------------------------------------------------------------------------------------------------------------------------------------------------------------------------------------------|
| Hepatic Fibrosis /<br>Hepatic Stellate Cell<br>Activation | 9.22          | 0.140 | ACTA2,AGTR1,CD14,COL16A1,COL1A1,COL2A1,COL4A1,COL4A2,COL5A1,COL5A3,COL6A1,COL6A2,COL6A3,COL7A1,COL8A2,COL9A1,FGF1,FGFR1,ICAM1,IGFBP5,IL10,IL10RA,MMP9,MYH10,TIMP1,TNFRSF1B                       |
| GP6 Signaling Pathway                                     | 7.11          | 0.151 | COL16A1,COL1A1,COL2A1,COL4A1,COL4A2,COL5A1,COL5A3,COL6A1,COL6A2,COL6A3,COL7A1,COL8A2,COL9A1,FCER1G,LAMA3,PIK3R5,PRKCB,SYK                                                                        |
| Hepatic Fibrosis<br>Signaling Pathway                     | 5.65          | 0.084 | ACTA2,AGTR1,COL1A1,COL2A1,COL5A3,CTNNB1,CYBB,FGFR1,FOS,FOS,FOXO4,FZD10,FZD3,FZD4,GLIS1,ICAM1,IL1RN,IL33,IRAK3,ITGA4,KLF9,PIK3R5,PRKACA,PRKAG2,PRKAR2B,PRKCB,TCF7L1,TF,TIMP1,TNFRSF1B,WNT5B,WNT7B |
| Osteoarthritis Pathway                                    | 5.65          | 0.104 | ACAN,ADAMTS5,ALPL,CNMD,COL2A1,CTNNB1,FGFR1,FZD10,FZD3,FZD4,GLIS1,H19,ITGA4,JAG1,MATN3,MMP9,P2RX7,PRKAA2,PRKAG2,TCF7L1,TIMP3,TNFRSF1B                                                             |
| Cell Cycle: G2/M DNA<br>Damage Checkpoint<br>Regulation   | 5.41          | 0.204 | AURKA,BRCA1,CCNB1,CCNB2,CDK1,CKS2,GADD45A,PLK1,RPS6KA1,TOP2A                                                                                                                                     |

| Pathways                                                  | -log(p-value) | Ratio | Molecules                                                                                                                                                                                                                                                                                                               |
|-----------------------------------------------------------|---------------|-------|-------------------------------------------------------------------------------------------------------------------------------------------------------------------------------------------------------------------------------------------------------------------------------------------------------------------------|
| Hepatic Fibrosis /<br>Hepatic Stellate<br>Cell Activation | 14.4          | 0.215 | ACTA2, COL10A1, COL11A1, COL12A1, COL15A1, COL16A1, COL1A1, COL1A2, COL21A1, COL27A1, COL2A1, COL3A1, COL4A1, COL4A2, COL4A5, COL5A1, COL5A2, COL5A3, COL6A1, COL6A3, COL7A1, COL8A2, COL9A1, COL9A2, COL9A3, CSF1, ICAM1, IGF2, IGFBP5, IL10, IL1RL1, MMP1, MYH14, PDGFD, PDGFRB, SERPINE1, TGFB2, TGFB3, TGFR2, TIMP1 |
| GP6 Signaling<br>Pathway                                  | 13.6          | 0.258 | COL10A1, COL11A1, COL12A1, COL15A1, COL16A1, COL1A1, COL1A2, COL21A1, COL27A1, COL2A1, COL3A1, COL4A1, COL4A2, COL4A5, COL5A1, COL5A2, COL5A3, COL6A1, COL6A3, COL7A1, COL8A2, COL9A1, COL9A2, COL9A3, FGG, ITGB3, LAMA3, LAMB2, LCP2, PIK3CD, PRKCZ                                                                    |
| Osteoarthritis<br>Pathway                                 | 7.52          | 0.150 | ACAN, ADAMTS5, ALPL, ANKH, CASP12, CASP4, CNMD, COL10A1, COL2A1, DDR2, FGFR3, FZD5, FZD7, H19, HES1, HIF1A, IHH, IL1RL1, ITGA4, MATN3, MMP1, NKX3-2, NOS2, PRKAB2, PTH1R, RBP4, SMAD1, SOX9, SP7, SPHK1, SPP1, TGFBR2                                                                                                   |
| Interferon<br>Signaling                                   | 6.99          | 0.333 | IFI35, IFI6, IFIT1, IFIT3, IFITM1, IFITM2, IFITM3, IRF1, ISG15, MX1, OAS1, STAT2                                                                                                                                                                                                                                        |
| Atherosclerosis<br>Signaling                              | 6.02          | 0.169 | APOD, APOL1, COL10A1, COL1A1, COL1A2, COL2A1, COL3A1, COL5A3, CSF1, ICAM1, IL33, ITGA4, LPL, MMP1, PDGFD, PLA2G12A, PLA2G2A, PLAAT3, PLAAT4, RBP4, SERPINA1                                                                                                                                                             |
